# Supplementary material
Source: PubMed Central journal article supplement (PMC7287420)

# Impact of COVID-19 on endoscopy trainees: An international survey

## Supplementary Digital Content

|                                                                                                                                                                     |          |
|---------------------------------------------------------------------------------------------------------------------------------------------------------------------|----------|
| <b>Appendix 1:</b> The international training (EndoTrain) survey                                                                                                    | Page 1-4 |
| <b>Appendix 2:</b> Supplementary Table 1 - List of societies that supported dissemination of the survey                                                             | Page 5   |
| <b>Appendix 3:</b> Supplementary Table 2 - List of countries with respondents                                                                                       | Page 6   |
| <b>Appendix 4:</b> Supplementary Figure 1 - International distribution of EndoTrain survey respondents                                                              | Page 7   |
| <b>Appendix 5:</b> Supplementary Figure 3 - Association between anxiety, as measured by the Generalized Anxiety Disorder 7 (GAD-7) instrument, and rates of burnout | Page 8   |

## Appendix 1: The International Training (EndoTrain) Survey

### A - Demographics

1. What is your age (*optional - numerical box*)
2. Your gender (*optional*)
  - a. Female
  - b. Male
  - c. Other (*free text option*)
3. Country of training
4. What specialty are you in?
  - a. Adult gastroenterology
  - b. Pediatric gastroenterology
  - c. Surgery
  - d. Internal Medicine
  - e. Other (*free text option*)
5. Number of years in endoscopy training (*numerical box*)
6. Are you currently doing an advanced endoscopy fellowship? YES/NO
7. What is the focus of your endoscopy training program? (*Tick all that apply*)
  - a. Upper GI
  - b. Lower GI
  - c. ERCP
  - d. EUS
  - e. Other (*free text*)
9. Prior to the COVID-19 pandemic, approximately how many procedures would you perform each month **independently** (without supervision within the room) for the following: (*numerical box, default value set at 0*)
  - a. EGD/OGD
  - b. Colonoscopy
  - c. ERCP
  - d. EUS
  - e. Therapy for Upper GI bleed
10. Has your exposure to endoscopy cases decreased during the COVID-19 pandemic?
  - a. YES (if Yes, please indicate the reason(s) for decreased endoscopy case volume- tick all that apply)
    - i. Lack of cases
    - ii. Lack of PPE availability
    - iii. Personal decision
    - iv. Institutional policy
    - v. Redeployed to another clinical area
    - vi. Other (specify [free text comment])
  - b. NO
11. Which endoscopy opportunities still remain for you? (tick all that applies)
  - a. None (not performing endoscopy)
  - b. No restrictions
  - c. Only procedures which I can perform without supervision
  - d. Only patients at low-risk/negative for COVID-19
  - e. ICU cases
  - f. Emergency cases
  - g. Other (*free text comment*)

### B – Endoscopy

8. Prior to the COVID-19 pandemic, approximately how many procedures would you perform each month **under supervision** for the following:
  - a. EGD/OGD
  - b. Colonoscopy
  - c. ERCP
  - d. EUS
  - e. Therapy for Upper GI bleed
12. Prior to the COVID-19 pandemic, did you participate in an emergency (on-call) endoscopy rota/schedule?
  - a. YES – If Yes, since COVID-19, has this:

- i. Stopped
  - ii. Reduced infrequency
  - iii. Remain unchanged
- b. NO

13. How has your institution's case volume been affected by the COVID-19 pandemic?
- a. Not affected
  - b. Yes, but don't know
  - c. Decreased by 1-25%
  - d. Decreased by 26-50%
  - e. Decreased by 51-75%
  - f. Decreased by 76-99%
  - g. Decreased by 100% (no endoscopy being performed at all)

14. During the COVID-19 pandemic, approximately how many procedures are you performing each month **under supervision** for the following: *(numerical box, default value set at 0)*
- a. EGD/OGD
  - b. Colonoscopy
  - c. ERCP
  - d. EUS
  - e. Therapy for Upper GI bleed

15. During the COVID-19 pandemic, approximately how many procedures are you performing each month **independently** for the following: *(numerical box, default value set at 0)*
- a. EGD/OGD
  - b. Colonoscopy
  - c. ERCP
  - d. EUS
  - e. Therapy for Upper GI bleed

#### D – PPE

16. Have you received any training on appropriate use of PPE for COVID-19 patients?
- a. YES

b. NO

17. Have you received any training on how to manage a COVID-19 patient in your endoscopy unit?

- a. YES
  - i. In person
  - ii. By virtual meeting
  - iii. By written communication

b. NO

18. Do you feel that the level of PPE used in your endoscopy unit during the COVID-19 pandemic is adequate?

- a. YES
- b. NO

19. Has your institution restricted endoscopy volume because of insufficient PPE?

- a. YES
- b. NO

20. Does your endoscopy unit follow guidelines for protection against COVID-19?

- a. YES (pick one)
  - i. National
  - ii. Societal
  - iii. Hospital's own recommendations

b. NO

#### E – Well Being

21. Have you taken time off work because of confirmed or suspected COVID-19?

- a. YES
  - i. For Myself
  - ii. For a household member

b. NO

22. Have you tested positive for COVID-19?

- a. YES

- b. NO
  - c. Not tested
  - d. Prefer not to answer
23. How concerned are you about COVID-19 exposure during your current endoscopy training?
- a. Not concerned
  - b. Slightly concerned
  - c. Moderately concerned
  - d. Extremely concerned
  - e. N/A (not training)
24. How concerned are you that the COVID-19 pandemic is going to affect your competency in performing endoscopy?
- a. Not concerned
  - b. Slightly concerned
  - c. Moderately concerned
  - d. Extremely concerned
25. Are you concerned that the impact of COVID-19 on endoscopy training may prolong your fellowship/specialty training?
- a. Not concerned
  - b. Slightly concerned
  - c. Moderately concerned
  - d. Extremely concerned
26. Over the last 2 weeks, how often have you been affected by the following: (*responses: Not at all, Several days, Over half of the days, Nearly every day*)
- a. Feeling nervous, anxious or on edge
  - b. Not being able to stop or control worrying
  - c. Worrying too much about different things
  - d. Trouble relaxing
  - e. Being so restless that it is hard to sit still
  - f. Becoming easily annoyed or irritable
  - g. Feeling afraid as if something awful might happen
- h. Feeling loss of control
  - i. Not being able to focus on work
  - j. Anxiety of yourself or a loved one getting ill from COVID-19
27. During this COVID-19 pandemic, how difficult is it for you to be yourself with others?
- a. Not difficult at all
  - b. Somewhat difficult
  - c. Very difficult
  - d. Extremely difficult
28. Overall, how would you rate your level of burnout? (*select the most appropriate statement*)
- a. I enjoy my work and have no symptoms of burnout
  - b. Occasionally I am under stress, and I don't always have as much energy as I once did, but don't feel burned out
  - c. I am definitely burning out and have one or more symptoms of burnout, such as physical and emotional exhaustion
  - d. The symptoms of burnout that I'm experiencing won't go away. I think about frustration at work a lot
  - e. I feel completely burned out and often wonder if I can go on. I am at the point where I may need some changes or may need to seek some sort of help
29. Is your institution/program offering emotional or mental health support during these times?
- a. Yes
    - i. Formal group or individual session
    - ii. Drop-in sessions
    - iii. Yes, but did not access
  - b. No

## F – Education

30. If the COVID-19 pandemic has impacted your hands-on endoscopy training, what additional training have you undertaken to supplement your endoscopy education? (*responses: 1) Have not used, 2) 1-2 times in the last month, 3) Weekly, 4) 1-2 times per week, 5) 3-5 times per week, 6) Daily*)
- a. Physically attending organised teaching from your institution
  - b. Distance learning from your institution
  - c. Online courses from national/international societies
  - d. Social media education
  - e. Endoscopy journals (including electronic)
  - f. Webinars
  - g. Other (free-text)
31. Do you believe that your national/societal guidelines should be modified to support endoscopy training during COVID-19?
- a. Yes (please feel free to comment -*option for free text*)
  - b. No
32. Do you have any additional comments or suggestions on how to improve training during the COVID-19 pandemic? (optional)

**Appendix 2:** List of societies that supported dissemination of the survey

| <b>Society/ Group</b>                                                                                                                                                                                                                                                                                                                                                                                                                                                                                                                                                                                                                                                                                                                                                                                                                                                                                                                                                                                                                                                                                                                                                                                                                                                                                                                                                                                                                                                                                                                                         |                                                                                                                                                                                                                                                                                                                                                                                                                                                                                                                                                                                                                                                                                                                                                                                                                                                                                                                                                                                                                                                                                                                                                                                                                                                                                                                                                                                                                                                                       |
|---------------------------------------------------------------------------------------------------------------------------------------------------------------------------------------------------------------------------------------------------------------------------------------------------------------------------------------------------------------------------------------------------------------------------------------------------------------------------------------------------------------------------------------------------------------------------------------------------------------------------------------------------------------------------------------------------------------------------------------------------------------------------------------------------------------------------------------------------------------------------------------------------------------------------------------------------------------------------------------------------------------------------------------------------------------------------------------------------------------------------------------------------------------------------------------------------------------------------------------------------------------------------------------------------------------------------------------------------------------------------------------------------------------------------------------------------------------------------------------------------------------------------------------------------------------|-----------------------------------------------------------------------------------------------------------------------------------------------------------------------------------------------------------------------------------------------------------------------------------------------------------------------------------------------------------------------------------------------------------------------------------------------------------------------------------------------------------------------------------------------------------------------------------------------------------------------------------------------------------------------------------------------------------------------------------------------------------------------------------------------------------------------------------------------------------------------------------------------------------------------------------------------------------------------------------------------------------------------------------------------------------------------------------------------------------------------------------------------------------------------------------------------------------------------------------------------------------------------------------------------------------------------------------------------------------------------------------------------------------------------------------------------------------------------|
| <p><b>America</b></p> <ul style="list-style-type: none"> <li>• Pan American Crohn’s and Colitis Organization (PANCCO)</li> </ul> <p><b>North America</b></p> <ul style="list-style-type: none"> <li>• Adult Gastroenterology, Pediatric Gastroenterology and Surgery Program Directors across North America</li> <li>• Canadian Association of Gastroenterology (CAG)</li> <li>• The American College of Gastroenterology (ACG)</li> <li>• The American Gastroenterological Association (AGA)</li> <li>• GI Training Group of North America</li> </ul> <p><b>Latin America</b></p> <ul style="list-style-type: none"> <li>• Adult Gastroenterology, Pediatric Gastroenterology and Surgery Program Directors across Latin America</li> <li>• Chilean Endoscopy Association/Asociación Chilena de Endoscopia Digestiva (ACHED)</li> <li>• Endoscopy Society of El Salvador</li> <li>• Gastroenterology Society of Argentina/Sociedad Argentina de Gastroenterología (SAGE)</li> <li>• Gastrointestinal Endoscopy Program Directors in Mexico</li> <li>• Mexican Association of Gastroenterology/Asociación Mexicana de Gastroenterología (AMG)</li> <li>• Mexican Association of Gastrointestinal Endoscopy/Asociación</li> <li>• Mexicana de Endoscopia Gastrointestinal (AMEG)</li> <li>• Peruvian Society of Gastroenterology/Sociedad Peruana de Gastroenterología (SGP)</li> <li>• Venezuelan Society of Gastroenterology</li> <li>• Young Trainee Group of Argentina, Brazil, Chile, Colombia, Venezuela</li> <li>• TG of El Salvador, Panamá</li> </ul> | <p><b>Asia</b></p> <ul style="list-style-type: none"> <li>• Gastrointestinal Society of Kuwait</li> <li>• Philippine Society of Digestive Endoscopy (PSDE)</li> <li>• Saudi Gastroenterology Association (SGA)</li> <li>• The Asian-Pacific Association of Gastroenterology (APAGE)</li> <li>• The Asian-Pacific Society of Digestive Endoscopy (APSDE)</li> <li>• Kuwait Gastroenterology Association (KGA)</li> <li>• The Hong Kong Society of Gastroenterology</li> <li>• The Japan Gastroenterological Endoscopy Society (JGES)</li> <li>• The Society of Gastrointestinal Endoscopy of India (SGEI)</li> </ul> <p><b>Australia &amp; New Zealand</b></p> <ul style="list-style-type: none"> <li>• Gastroenterological Society of Australia (GESA) Young Group</li> <li>• New Zealand Society of Gastroenterology (NZSG)</li> </ul> <p><b>Europe</b></p> <ul style="list-style-type: none"> <li>• Czech Gastroenterological Society (ČGS)</li> <li>• Czech Young Trainee Group</li> <li>• Junge Gastroenterollege Arbietsgruppe (JUGA)</li> <li>• European Society for Paediatric Gastroenterology Hepatology and Nutrition (ESPGHAN)</li> <li>• Polish Society of Young Endoscopist</li> <li>• Spanish Association of Gastroenterology/Asociación Española de Gastroenterología (AEG)</li> <li>• Spanish Association of Digestive Endoscopy/Sociedad Española de Endoscopia Digestiva (SEED)</li> <li>• The British Society of Gastroenterology (BSG)</li> </ul> |

### Appendix 3: List of countries with respondents

| Country                    | Number of Responses | Percent |
|----------------------------|---------------------|---------|
| Afghanistan                | 3                   | 0.39    |
| Albania                    | 2                   | 0.26    |
| Algeria                    | 2                   | 0.26    |
| Argentina                  | 11                  | 1.43    |
| Australia                  | 23                  | 2.99    |
| Barbados                   | 2                   | 0.26    |
| Belgium                    | 3                   | 0.39    |
| Bhutan                     | 1                   | 0.13    |
| Bosnia and Herzegovina     | 1                   | 0.13    |
| Brazil                     | 7                   | 0.91    |
| Bulgaria                   | 6                   | 0.78    |
| Burkina Faso               | 1                   | 0.13    |
| Canada                     | 34                  | 4.42    |
| Chile                      | 3                   | 0.39    |
| China                      | 7                   | 0.91    |
| Colombia                   | 3                   | 0.39    |
| Croatia                    | 1                   | 0.13    |
| Cuba                       | 2                   | 0.26    |
| Czech Republic             | 25                  | 3.25    |
| Dominican Republic         | 1                   | 0.13    |
| Ecuador                    | 4                   | 0.52    |
| Egypt                      | 5                   | 0.65    |
| El Salvador                | 3                   | 0.39    |
| France                     | 2                   | 0.26    |
| Germany                    | 5                   | 0.65    |
| Greece                     | 2                   | 0.26    |
| Guatemala                  | 1                   | 0.13    |
| Hungary                    | 1                   | 0.13    |
| India                      | 8                   | 1.04    |
| Iran (Islamic Republic of) | 7                   | 0.91    |
| Iraq                       | 1                   | 0.13    |
| Ireland                    | 1                   | 0.13    |

| Country                            | Number of Responses | Percent       |
|------------------------------------|---------------------|---------------|
| Israel                             | 1                   | 0.13          |
| Italy                              | 2                   | 0.26          |
| Lebanon                            | 8                   | 1.04          |
| Malaysia                           | 4                   | 0.52          |
| Mexico                             | 31                  | 4.03          |
| Nepal                              | 1                   | 0.13          |
| Netherlands                        | 2                   | 0.26          |
| New Zealand                        | 17                  | 2.21          |
| Nicaragua                          | 1                   | 0.13          |
| Pakistan                           | 4                   | 0.52          |
| Paraguay                           | 1                   | 0.13          |
| Peru                               | 10                  | 1.30          |
| Poland                             | 33                  | 4.29          |
| Portugal                           | 1                   | 0.13          |
| Romania                            | 5                   | 0.65          |
| Saudi Arabia                       | 25                  | 3.25          |
| Serbia                             | 5                   | 0.65          |
| Sierra Leone                       | 1                   | 0.13          |
| Singapore                          | 6                   | 0.78          |
| Slovakia                           | 4                   | 0.52          |
| Spain                              | 82                  | 10.65         |
| Sudan                              | 4                   | 0.52          |
| Switzerland                        | 6                   | 0.78          |
| Thailand                           | 2                   | 0.26          |
| Turkey                             | 5                   | 0.65          |
| Ukraine                            | 1                   | 0.13          |
| United Arab Emirates               | 3                   | 0.39          |
| United Kingdom of Great Britain    | 132                 | 17.14         |
| United States of America           | 169                 | 21.95         |
| Venezuela (Bolivarian Republic of) | 20                  | 2.60          |
| Vietnam                            | 5                   | 0.65          |
| <b>Total</b>                       | <b>770</b>          | <b>100.00</b> |

**Appendix 4: International distribution of EndoTrain survey respondents**

**Number of respondents**

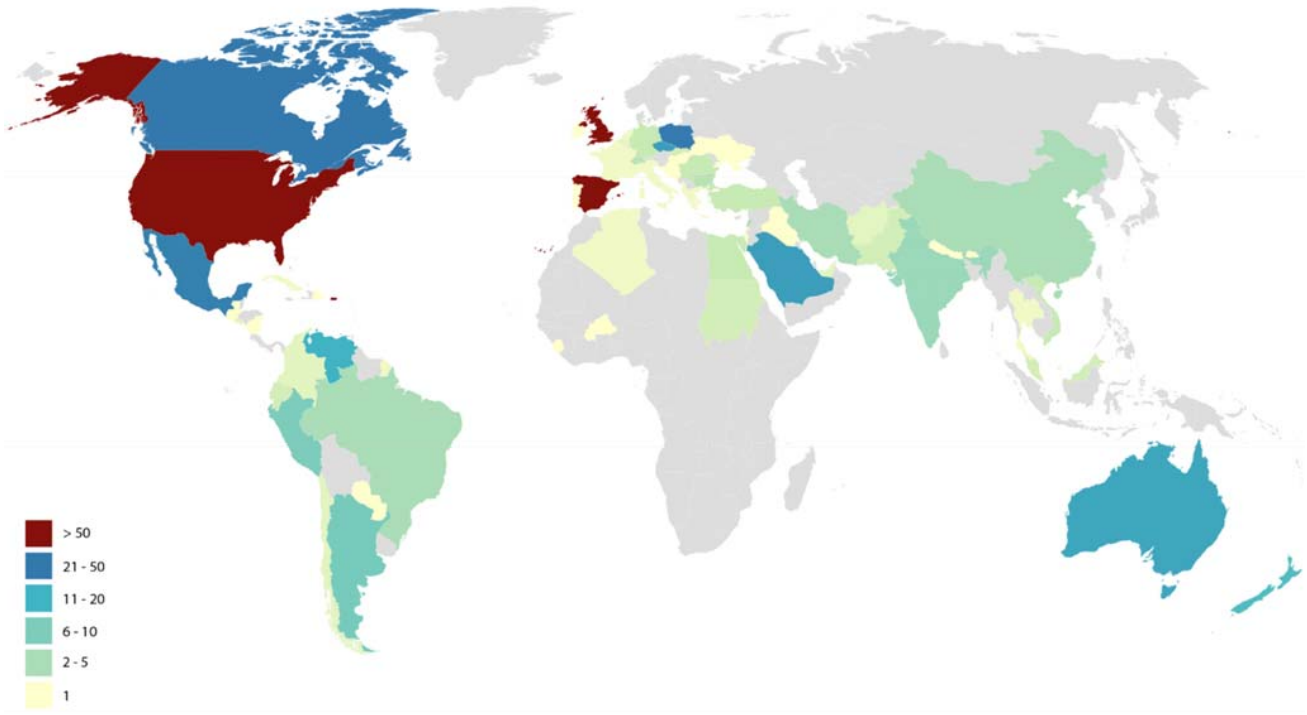



**Appendix 5:** Association between anxiety, as measured by the Generalized Anxiety Disorder 7 (GAD-7) instrument, and rates of burnout

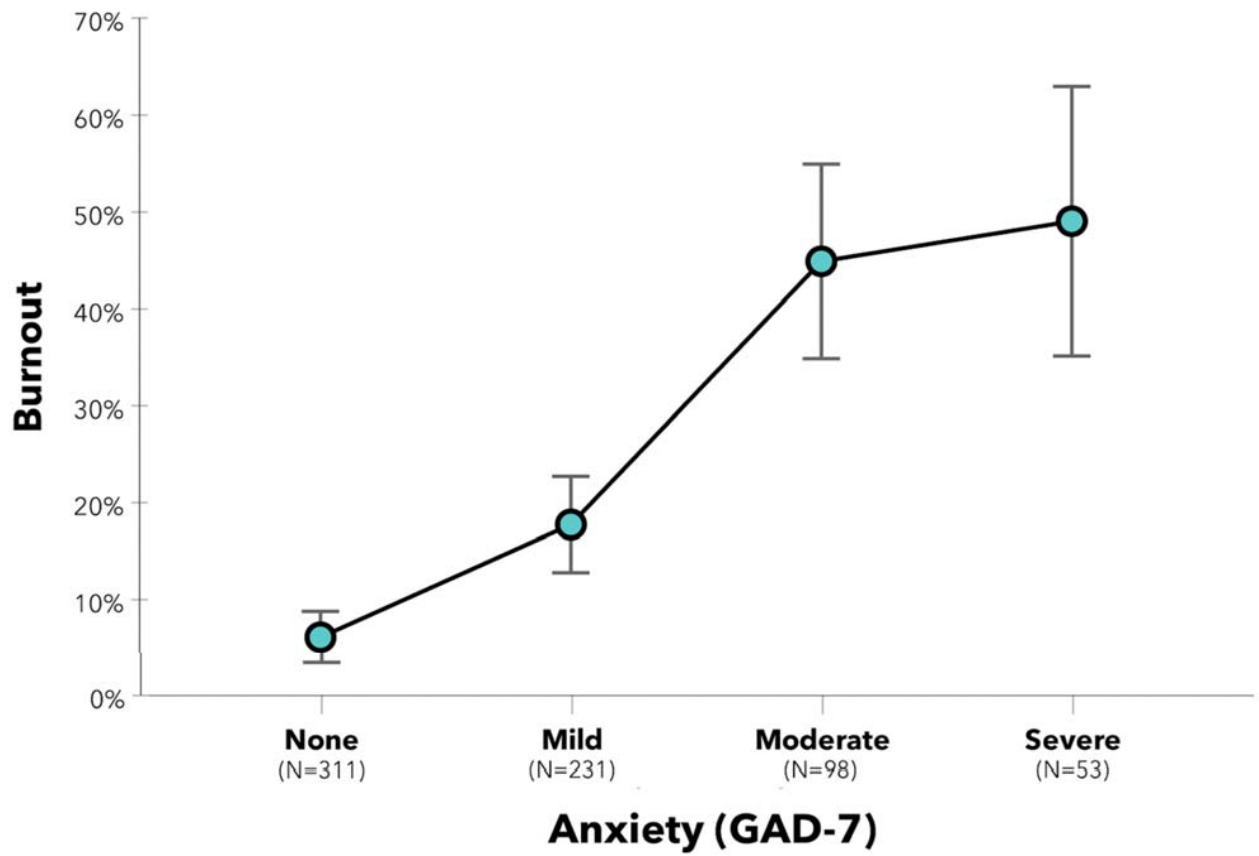

Supplement: mmc1.pdf [file mmc1.pdf]
